## ANESTHESIOLOGY

# Percutaneous Peripheral Nerve Stimulation (Neuromodulation) for Postoperative Pain: A Randomized, Sham-controlled Pilot Study

Brian M. Ilfeld, M.D., M.S., Anthony Plunkett, M.D., Alice M. Vijjeswarapu, M.D., Robert Hackworth, M.D., Sandeep Dhanjal, M.D., Alparslan Turan, M.D., Steven P. Cohen, M.D., James C. Eisenach, M.D., Scott Griffith, M.D., Steven Hanling, M.D., Daniel I. Sessler, M.D., Edward J. Mascha, Ph.D., Dongsheng Yang, M.S., Joseph W. Boggs, Ph.D., Amorn Wongsampigoon, Ph.D., Harold Gelfand, M.D., on behalf of the PAINfRE Investigators\*

*ANESTHESIOLOGY* 2021; 135:95–110

## EDITOR'S PERSPECTIVE

### What We Already Know about This Topic

- Postoperative pain management relies primarily on pharmacologic approaches with limited effectiveness
- Peripheral nerve stimulation is effective in controlling some forms of chronic pain but has not been tested in the postoperative setting

### What This Article Tells Us That Is New

- The use of active *versus* sham percutaneous peripheral nerve stimulation was associated with a reduction in pain scores and opioid consumption in the first 7 days after upper and lower extremity surgery
- Peripheral nerve stimulation may also reduce pain's interference with physical and emotional functioning with few side effects

## ABSTRACT

**Background:** Percutaneous peripheral nerve stimulation is an analgesic technique involving the percutaneous implantation of a lead followed by the delivery of electric current using an external pulse generator. Percutaneous peripheral nerve stimulation has been used extensively for chronic pain, but only uncontrolled series have been published for acute postoperative pain. The current multicenter study was undertaken to (1) determine the feasibility and optimize the protocol for a subsequent clinical trial and (2) estimate the treatment effect of percutaneous peripheral nerve stimulation on postoperative pain and opioid consumption.

**Methods:** Preoperatively, an electrical lead was percutaneously implanted to target the sciatic nerve for major foot/ankle surgery (*e.g.*, hallux valgus correction), the femoral nerve for anterior cruciate ligament reconstruction, or the brachial plexus for rotator cuff repair, followed by a single injection of long-acting local anesthetic along the same nerve/plexus. Postoperatively, participants were randomized to 14 days of either electrical stimulation ( $n = 32$ ) or sham stimulation ( $n = 34$ ) using an external pulse generator in a double-masked fashion. The dual primary treatment effect outcome measures were (1) cumulative opioid consumption (in oral morphine equivalents) and (2) mean values of the "average" daily pain scores measured on the 0 to 10 Numeric Rating Scale within the first 7 postoperative days.

**Results:** During the first 7 postoperative days, opioid consumption in participants given active stimulation was a median (interquartile range) of 5 mg (0 to 30) *versus* 48 mg (25 to 90) in patients given sham treatment (ratio of geometric means, 0.20 [97.5% CI, 0.07 to 0.57];  $P < 0.001$ ). During this same period, the average pain intensity in patients given active stimulation was a mean  $\pm$  SD of  $1.1 \pm 1.1$  *versus*  $3.1 \pm 1.7$  in those given sham (difference,  $-1.8$  [97.5% CI,  $-2.6$  to  $-0.9$ ];  $P < 0.001$ ).

**Conclusions:** Percutaneous peripheral nerve stimulation reduced pain scores and opioid requirements free of systemic side effects during at least the initial week after ambulatory orthopedic surgery.

(*ANESTHESIOLOGY* 2021; 135:95–110)

Tens of millions of surgical procedures are performed on an ambulatory basis each year in the United States.<sup>1</sup> Many patients experience inadequate analgesia,<sup>2,3</sup> leading to physical and emotional suffering, inferior rehabilitation,<sup>4</sup> and the risk of transitioning from acute to chronic ("persistent") postoperative pain, which has an incidence

This article is featured in "This Month in Anesthesiology," page A1. Supplemental Digital Content is available for this article. Direct URL citations appear in the printed text and are available in both the HTML and PDF versions of this article. Links to the digital files are provided in the HTML text of this article on the Journal's Web site ([www.anesthesiology.org](http://www.anesthesiology.org)). This article has an audio podcast. This article has a visual abstract available in the online version.

Submitted for publication December 21, 2020. Accepted for publication March 5, 2021. Published online first on April 15, 2021. From the Department of Anesthesiology, University of California-San Diego, San Diego, California (B.M.I.); the Department of Anesthesiology, Womack Army Medical Center, Fort Bragg, Fayetteville, North Carolina (A.P.); the Department of Anesthesiology, Cedars-Sinai Medical Center, Los Angeles, California (A.M.V.); the Department of Anesthesiology, Naval Medical Center San Diego, San Diego, California (R.H.); the Department of Anesthesiology, Brooke Army Medical Center, Fort Sam Houston, San Antonio, Texas (S.D.); the Departments of General Anesthesiology (A.T.), Outcomes Research (A.T., D.I.S., E.J.M., D.Y.), and Quantitative Health Sciences (E.J.M., D.Y.), Cleveland Clinic, Cleveland, Ohio; the Department of Anesthesiology, Johns Hopkins Hospital, Baltimore, Maryland (S.P.C.); the Department of Anesthesiology, Wake Forest School of Medicine, Winston-Salem, North Carolina (J.C.E.); the Department of Anesthesiology, Walter Reed National Military Medical Center, Bethesda, Maryland (S.G., H.G.); the Department of Physical Medicine and Rehabilitation, Columbia Veterans Affairs Health Care System, Columbia, South Carolina (S.H.); and SPR Therapeutics, Inc., Cleveland, Ohio (J.W.B., A.W.).

\*The PAINfRE Investigators are listed in appendix 2.

Copyright © 2021, the American Society of Anesthesiologists. All Rights Reserved. *Anesthesiology* 2021; 135:95–110. DOI: 10.1097/ALN.0000000000003776

of 10 to 50%.<sup>5</sup> Inadequately controlled postoperative pain is largely consequent to excessive reliance on perioperative opioids—the foundation of postoperative analgesia for over a century. Unfortunately, opioids have well documented detrimental consequences for both individuals and society.<sup>6,7</sup> Even minor ambulatory surgical procedures can lead to chronic opioid use, with significant negative consequences such as hyperalgesia, dependence, and substance use disorder.<sup>8</sup>

Percutaneous peripheral nerve stimulation is an analgesic alternative that may improve postoperative analgesia while concurrently reducing or obviating opioid requirements, all without any demonstrated risk of adverse systemic side effects.<sup>9</sup> Insulated leads small enough to be introduced *via* a needle are now available, enabling relatively rapid ultrasound-guided percutaneous implantation and subsequent withdrawal with simple traction.<sup>10</sup> An external pulse generator is adhered directly to the skin, delivering a small electric current through the insulated lead to the target nerve.<sup>9</sup>

Ultrasound-guided percutaneous peripheral nerve stimulation was first reported *in situ* by Huntoon and Burgher<sup>11</sup> in 2009 using an epidural neurostimulation electrode for the treatment of neuropathic pain. Although various lead designs and percutaneous approaches have been reported subsequently, they were used nearly exclusively for chronic pain conditions.<sup>12</sup> In 2018, the U.S. Food and Drug Administration (Silver Spring, Maryland) cleared the first percutaneous peripheral nerve stimulation lead and pulse generator system for use treating acute postoperative and chronic pain.<sup>9</sup> Multiple case reports and small series suggest substantial analgesic and opioid-sparing benefits after painful surgical procedures,<sup>13–18</sup> but no data from randomized studies involving acute pain are available to validate the technique and quantify any risks and benefits.

We therefore conducted a pilot multicenter, randomized, controlled study to assess the feasibility of a future larger trial and estimate potential benefits and risks of percutaneous peripheral nerve stimulation for analgesia after moderately to severely painful ambulatory surgery. Specifically, we sought to evaluate percutaneous peripheral nerve stimulation for ambulatory orthopedic surgical procedures to (1) determine the feasibility of and optimize a study protocol and (2) estimate analgesia and opioid sparing within the initial postoperative week.

## Materials and Methods

This study followed good clinical practice and was conducted within the ethical guidelines outlined in the Declaration of Helsinki. The trial was prospectively registered at [clinicaltrials.gov](http://clinicaltrials.gov) (NCT03481725; Ilfeld, March 29, 2018). The protocol was approved by the institutional review board at each of the seven enrolling centers (table A, Supplemental Digital Content 1, <http://links.lww.com/ALN/C594>), as well as the U.S. Army Medical Research

and Development Command Human Research Protection Office. An independent data safety monitoring board was responsible for the conduct and oversight of all aspects of the investigation from the planning phase through data analysis (appendix 1). Written, informed consent was obtained from all participants.

## Participants

Enrollment was offered to adult patients at least 18 yr of age scheduled for ambulatory orthopedic surgery with a planned single-injection peripheral nerve block for postoperative analgesia. The surgical procedures included rotator cuff repair, hallux valgus correction, anterior cruciate ligament repair with a patellar autograft, and ankle arthrodesis, or arthroplasty. Patients were excluded for (1) chronic analgesic use including opioids (daily use within the 2 weeks before surgery and duration of use of more than 4 weeks); (2) neuromuscular deficit of the target nerve(s); (3) compromised immune system based on medical history (*e.g.*, immunosuppressive therapies such as chemotherapy, radiation, sepsis, infection), or other condition that placed the subject at increased infection risk; (4) implanted spinal cord stimulator, cardiac pacemaker/defibrillator, deep brain stimulator, or other implantable neurostimulator whose stimulus current pathway may overlap; (5) history of bleeding disorder; (6) antiplatelet or anticoagulation therapies other than aspirin; (7) allergy to skin-contact materials (occlusive dressings, bandages, tape, *etc.*); (8) incarceration; (9) pregnancy; (10) chronic pain for more than 3 months of any severity in an anatomic location other than the surgical site; (11) anxiety disorder; (12) history of substance abuse; or (13) inability to contact the investigators during the treatment period, and vice versa (*e.g.*, lack of telephone access).

## Lead Implantation

Preoperatively, participants had a percutaneous lead (MicroLead; SPR Therapeutics, Inc., USA) inserted to target the brachial plexus (shoulder),<sup>18</sup> femoral nerve (knee),<sup>15</sup> or sciatic nerve (foot/ankle)<sup>16</sup> under ultrasound guidance. Patients were positioned either supine (brachial plexus, femoral) or prone (sciatic) and had the lead site prepared with chlorhexidine gluconate/isopropyl alcohol solution and sterile drapes. A portable ultrasound and linear or curved array transducer within a sterile sleeve were utilized for lead implantation.

The stimulating probe was inserted into an introducer “sleeve” and then passed through a lidocaine skin wheal to approximately 2 cm from the epineurium of the target nerve. The probe was connected to an external pulse generator or “stimulator” (SPRINT PNS System; SPR Therapeutics, Inc.) with a surface return electrode placed on the ipsilateral limb. Electric current was delivered at 100 Hz with the intensity slowly increased from zero. The pulse generator intensity setting spans a range of 0 (no current)

to 100 (maximum), indicating a combination of amplitude (0 to 30 mA) and pulse duration (10 to 133  $\mu$ s), the specific combination of which at each intensity setting is proprietary and therefore unavailable for publication. The optimal sensory changes targeted the surgical area, and if sensory changes occurred in a different location or if muscle contractions were induced, the stimulator was switched off, and then the probe/introducer was advanced or withdrawn and readvanced with a slightly different trajectory.

This process was repeated until sensory changes (often described as a “pleasant massage”) were perceived in the surgical area. The current was decreased to zero, and the stimulating probe was withdrawn from the introducing sleeve, leaving the latter *in situ*. An introducing needle that was preloaded with the lead was inserted through the sleeve. The introducing needle-sleeve combination was then withdrawn, deploying the lead.

The lead was again connected to the stimulator to ensure that lead dislodgment did not occur during deployment (if so, a new lead was inserted). Wound closure adhesive (2-octyl 2-cyanoacrylate) was applied to the exit point, a connector block was attached to the lead approximately 2 cm from the skin entry point, the excess lead was removed with a sterile scissors, and the lead entry site was covered with a sterile dressing. The lead was connected to the stimulator a final time, and the settings were recorded. The stimulator was removed, leaving the lead *in situ*.

Immediately before surgery, participants received an ultrasound-guided single-injection interscalene (shoulder), adductor canal (knee), or popliteal-sciatic (foot/ankle) nerve block with 20 ml of ropivacaine 0.5% (with epinephrine). For surgical anesthesia, participants received a general anesthetic with intravenous propofol or inhaled volatile anesthetic in nitrous oxide and oxygen. Intravenous fentanyl, hydromorphone, and/or morphine were administered intraoperatively, as needed.

### Treatment Group Assignment

After confirmation of successful lead implantation, participants were randomly allocated to one of two possible treatments: either receiving electric current (experimental group) or not (sham/control group). Randomization was stratified by institution and anatomic lead location in a 1:1 ratio and in randomly chosen block sizes using computer-generated lists by the informatics group of the Department of Outcomes Research at the Cleveland Clinic (Cleveland, Ohio). Treatment group assignment was conveyed to the enrolling sites *via* the same secure Web-based system used to collect and collate all postintervention outcomes (Research Electronic Data Capture; Cleveland Clinic). The pulse generators (SPRINT PNS system; SPR Therapeutics, Inc.) are capable of being programmed to either (1) pass electrical current or (2) not pass electrical current. Importantly, these two modes (active and sham) are indistinguishable in appearance, and therefore, investigators,

participants, and all clinical staff were masked to treatment group assignment, with the only exception being the unmasked individual who programmed the stimulator and was not involved in subsequent patient assessments. The unmasked personnel who programmed the pulse generator provided the programmed unit in the off position to the individual interacting with the subject.

After surgery, the stimulator was attached to the lead and initiated within the recovery room. The level (0 to 100) was set for the lowest setting at which the participant had first sensed sensory changes after the initial lead implantation. Patients and their caretakers were educated on lead/stimulator care and functioning, and informed that individuals frequently do not have the sensations postoperatively that were experienced during preoperative lead implantation. However, therapeutic benefit with subthreshold stimulation may still occur.<sup>19</sup> In other words, once proper lead placement is confirmed with comfortable sensations during implantation, therapeutic levels of stimulation may be delivered subthreshold—below the intensity required for sensation—and still provide relief after surgery. Although the frequency (100 Hz) was fixed, the intensity was controlled by participants with a small Bluetooth-connected remote.<sup>20</sup> Patients were provided with two rechargeable batteries and instructed to keep one in the wall charger and the other attached to the pulse generator<sup>20</sup> and to exchange these two batteries at the same time once daily. A carryover analgesic effect allowed for showering after temporary stimulator disconnection and removal.<sup>21</sup>

Before discharge, participants and their caretakers were provided with verbal and written stimulator/lead instructions and the telephone and pager numbers of a local health-care provider available at all times while the lead was *in situ*. Participants were discharged home with their leads *in situ* and with a prescription for immediate release oral opioid tablets. Nonsteroidal anti-inflammatory drugs were not standardized because of the multiple surgeons involved at multiple enrolling centers. Acetaminophen was not prescribed, but subjects could self-administer this over-the-counter analgesic if they desired. Participants were contacted by telephone for endpoint collection. Lead removal occurred on postoperative day 14 by healthcare providers, but was allowed up to 2 days earlier based on patient convenience. Similar to perineural catheters, this procedure encompasses simply removing the occlusive dressing and slowly withdrawing the lead with gentle traction. If accidental premature dislodgment occurred, the patient could have the lead replaced, if desired. After study completion, the results were provided to all participants using nontechnical language.

### Outcome Measurements (Endpoints)

We selected outcome measures that have established reliability and validity, with minimal interrater discordance, and are recommended for pain-related clinical trials by the World Health Organization (Geneva, Switzerland) and the

Initiative on Methods, Measurement, and Pain Assessment in Clinical Trials (IMMPACT) consensus statement.<sup>22</sup> Outcomes were evaluated at baseline (before lead implantation); during the intervention (days 1 to 4, 7, and 11); and after lead removal (day 15 and months 1 and 4). Baseline measurements were collected in person, including the Post-Traumatic Stress Disorder Checklist, a 20-item self-report measure validated in military,<sup>23</sup> veteran,<sup>24–26</sup> and civilian populations.<sup>27</sup> All subsequent outcomes were collected by investigators at the University of California–San Diego (San Diego, California) by telephone regardless of enrolling center.

**Primary Outcome Measures.** The dual primary outcome measures were (1) the cumulative oral opioid consumption (in morphine equivalents)<sup>28</sup> and (2) the mean values of the “average” daily pain scores measured on the 0 to 10 Numeric Rating Scale within the initial 7 postoperative days. To claim percutaneous peripheral nerve stimulation was more effective, at least one of the primary outcomes had to be superior, with the other being either superior or at least noninferior. The Numeric Rating Scale is a highly sensitive measure of pain intensity with numbers ranging from 0 to 10, where 0 is equivalent to no pain and 10 is equivalent to the worst imaginable pain; it is a valid and reliable measure for evaluating analgesic interventions.<sup>29</sup> Additionally, Numeric Rating Scale scores correlate well with other measures of pain intensity<sup>30</sup> and demonstrate high test–retest reliability.<sup>31</sup> These Numeric Rating Scale characteristics led to World Health Organization and the Initiative on Methods, Measurement, and Pain Assessment in Clinical Trials consensus recommendations for use of the 10-point Numeric Rating Scale of pain intensity for pain trials.<sup>22</sup>

**Secondary Outcome Measures.** The primary instrument was the Brief Pain Inventory (short form), which assesses pain and its interference with physical and emotional functioning on days 3, 7, and 15, as well as months 1 and 4.<sup>32</sup> The instrument includes three domains: (1) *pain*, with four questions using a Numeric Rating Scale to evaluate four pain levels: “current,” “least,” “worst,” and “average”; (2) percentage of *relief* provided by pain treatments with one question; and (3) *interference* with physical and emotional functioning using a 0 to 10 scale (where 0 indicates no interference and 10 indicates complete interference). The seven interference questions involve general activity, mood, walking ability, normal work activities (both inside and outside of the home), relationships, sleep, and enjoyment of life.<sup>32</sup> These seven functioning questions can be combined to produce an interference subscale (0 to 70). The use of both single items (e.g., mood) and the composite scores is supported by the Initiative on Methods, Measurement, and Pain Assessment in Clinical Trials consensus recommendations for assessing pain in clinical trials.<sup>22,33</sup> Pain was also measured with the Defense and Veterans Pain Rating Scale on the same days as the Brief Pain Inventory. Quality of life

was measured with the World Health Organization Quality of Life (Brief) at months 1 and 4.<sup>34–36</sup> This instrument was developed by the World Health Organization to focus on those aspects of life most important to patients and is composed of 24 questions assessing four dimensions: (1) physical health, (2) psychologic health, (3) social relationships, and (4) environment.<sup>35</sup> Adverse events were reported to the institutional review boards, data safety monitoring boards, and the Army Human Research Protections Office.

## Statistical Analysis

The randomized groups were compared for balance on baseline characteristics using descriptive statistics and the standardized difference (*i.e.*, difference in means or proportions divided by pooled SD). Absolute standardized differences larger than 0.487 (using the formula described by Austin<sup>37</sup>) were considered imbalanced, and the corresponding variables were considered for adjustment in all analyses, either as a covariate in a model or using the stratified Wilcoxon rank sum test. Primary analyses were modified by intention to treat, such that all randomized patients who received at least some of the study intervention were included in the analyses and with the group to which they were randomized.

**Primary Outcomes.** We assessed the treatment effect of peripheral nerve stimulation *versus* usual and customary care on pain and opioid consumption using a joint hypothesis-testing framework. Specifically, we planned to conclude that peripheral nerve stimulation was more effective than (better than) usual and customary analgesia if found superior on at least one of average pain score and opioid consumption and not worse (*i.e.*, noninferior) on either.<sup>38</sup>

**Noninferiority Testing.** We first assessed noninferiority of peripheral nerve stimulation to usual care on each of the two outcomes using one-tailed noninferiority tests. The *a priori*–defined noninferiority  $\delta$  values were 1 point (worse) in pain score and 20% higher in opioid consumption. Noninferiority was assessed at the overall 0.025 significance level with no adjustment to the significance criterion for testing two outcomes because noninferiority is required on both outcomes; *i.e.*, an intersection union test. A noninferiority  $\delta$  of 1 point in pain score is conservative because receiver operating characteristic curve analysis has demonstrated that changes from baseline of at least 1.7 along a 10-point Numeric Rating Scale accurately identified patients who rated improvements as “much improved” or more, compared with those who perceived no change or worsening after analgesic interventions.<sup>39–41</sup>

We tested for noninferiority on pain score with a one-tailed *t* test in which the numerator was the estimated treatment effect from the model minus the noninferiority  $\delta$  (1 point), and the denominator was the standard error of the estimated treatment effect. The estimated treatment effect for pain score was derived from a linear mixed effects model with the outcome of patient “average” pain score for



each day, including fixed effects for intervention (peripheral nerve stimulation *vs.* usual care) and time (days 1 through 7). In doing so, we assumed an autoregressive correlation structure among measurements on the same patient over time. When presenting this analgesia data, the mean difference (97.5% CI) for the stimulation *versus* sham (placebo) was estimated from a repeated measures linear mixed model with an autoregressive correlation structure by adjusting for baseline Brief Pain Inventory average pain score and imbalanced surgical location; adjusting for baseline Brief Pain Inventory average pain score only; and adjusting for baseline Brief Pain Inventory average pain score, surgical location, and surgical type; interaction model (*i.e.*, treatment  $\times$  time) adjusting for baseline Brief Pain Inventory average pain score and imbalanced surgical location, and mean difference (97.5% CI) at each day was estimated from the interaction effect model. For the sensitivity analysis, median difference was estimated from the Wilcoxon rank sum test adjusted for surgical location and the Hodges–Lehmann estimator of location shift between groups.

Cumulative opioid consumption was not normally distributed but approximately log-normal. We therefore assessed the treatment effect of peripheral nerve stimulation *versus* usual care on log-transformed cumulative opioid consumption from recovery room discharge through postoperative day 7 using a simple linear regression model. The estimated treatment effect (*i.e.*, difference between groups) was then used in a noninferiority test with null ( $H_0$ ) and alternative ( $H_A$ ) hypotheses as  $H_0: \mu_1 - \mu_2 \geq \log(1.2) = 0.263$  *versus*  $H_A: \mu_1 - \mu_2 < \log(1.2) = 0.263$ , where  $\mu_1$  and  $\mu_2$  are the means of log-transformed opioid consumption for peripheral nerve stimulation and usual care, respectively, and  $\mu_1 - \mu_2$  is estimated by the coefficient (*i.e.*,  $\beta$ ) for peripheral nerve stimulation *versus* usual care in the regression model. The estimated treatment effect  $\beta$  is also an estimate of the ratio of geometric means for peripheral nerve stimulation *versus* usual care, assuming data are log-normal with similar coefficient of variation between groups.

In this planning phase, we placed focus on the estimated CI for the treatment effects and the variability of the outcomes (SD for pain score and coefficient of variation for opioid consumption). When presenting the opioid data, the ratio of means (97.5% CI) of the stimulation *versus* sham (placebo) was estimated from a multiple regression adjusting for imbalanced surgical location, without adjusting for surgical location, and adjusting for surgical location and surgical type; the median difference was estimated from the Wilcoxon rank sum test adjusted for surgical location and the Hodges–Lehmann estimator of location shift between groups.

**Superiority Testing.** Because noninferiority was found on both pain and opioid consumption, we next tested for superiority on each outcome using one-tailed tests in the same direction. For superiority testing, because superiority on either outcome was sufficient to reject the joint null

hypothesis (*i.e.*, a union-intersection test), we controlled the type I error at 0.025 across the two outcomes by using a Bonferroni correction and using  $0.025/2 = 0.0125$  as the significance criterion for each outcome.

**Secondary Outcomes.** We used a linear mixed effects model to assess the treatment effect over time for additional outcomes measured at postoperative days 1 to 7 (days 1, 2, 3, 4, and 7), as in the primary analysis, including worst pain and the Defense and Veterans Pain Rating Scale; we similarly assessed the treatment effect on total severity score and total interference score at days 3 and 7. For Brief Pain Inventory components and other outcomes analyzed at a single time point (days 11 and 15 and months 1 and 4), we used linear regression or the Wilcoxon rank sum test for ordinal outcomes, as appropriate, and chi-square analyses for binary outcomes (*e.g.*, incidence of chronic pain). We used the Wilcoxon rank sum test for quality of life measured by the World Health Organization Quality of Life (Brief) Instrument.

**Assessing Treatment Effect Heterogeneity.** We assessed the interaction between the treatment effect and the selected baseline variables of sex and surgical procedure (*e.g.*, ankle *vs.* shoulder/knee) on the primary outcomes of pain and opioid consumption using the relevant regression models. We did not require a significant interaction to report the treatment effect for each level of the baseline variables.

**Missing Data.** Missing outcomes data were summarized along with a known etiology of the absence. All analyses were intention to treat, and missing data were largely assumed to be missing at random. We therefore did not impute missing data for outcomes measured once or for repeated measures analyses. If we had reliable evidence that data were not missing at random, the data were analyzed within patterns of the missing data mechanism.

**Sample Size Considerations.** The planned pilot study sample size of 64 patients was chosen to be able to estimate the treatment effects of interest with moderate precision, *i.e.*, a CI width of roughly 1.1 SDs for each outcome measure. In addition, we were able to estimate a CI for a SD with width of 0.70 SDs. Estimates of the primary outcome treatment effects, the observed variability in the outcomes (*e.g.*, SD for pain score and coefficient of variation for opioid consumption), and the within-subject correlation in the linear mixed effects model from this Phase I study were used to plan the sample size for the larger trial.

The overall significance level was 0.025 for the one-tailed noninferiority and superiority testing for the primary outcomes. It was 0.05 for all other hypotheses because those were two-tailed tests for superiority. Statistical software from SAS (USA) was used for all analyses.

## Results

Between January 2019 and September 2020, a total of 66 patients were enrolled, had a lead successfully implanted, and

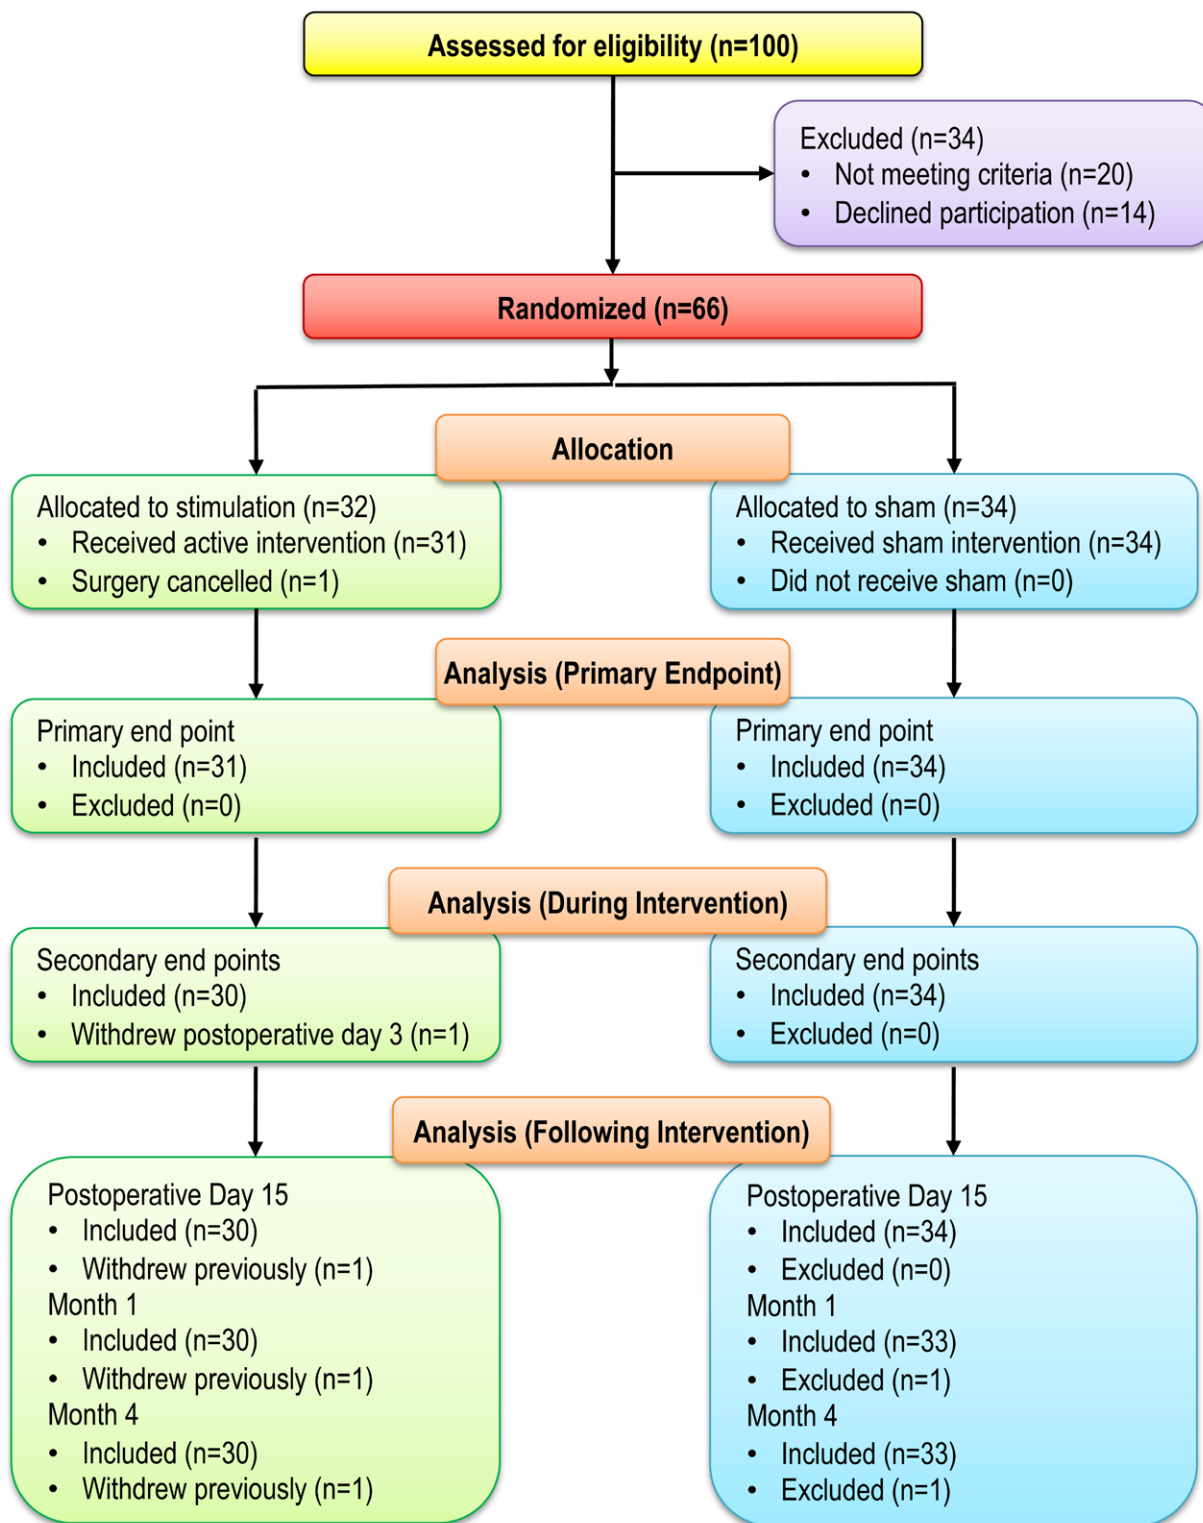

**Fig. 1.** Consolidated Standards of Reporting Trials diagram.

were randomized to either stimulation ( $n=32$ ) or sham ( $n=34$ ). The surgery for one participant randomized to active stimulation was cancelled, and he was therefore not included in the analysis because he received no portion of the intervention (fig. 1). Among baseline characteristics (table 1), only the surgical side was imbalanced between the two randomized groups with an absolute standardized difference of 0.490 (more than the imbalance criterion of 0.487) and was adjusted for in all analyses. One patient receiving stimulation withdrew from the study on postoperative day 3 and was included in all analyses per the intention-to-treat protocol.

### Primary Outcome

During the first 7 postoperative days, opioid consumption (oral morphine equivalents) in participants receiving active stimulation was a median (interquartile range) of 5 mg (0 to 30) *versus* 48 mg (25 to 90) in patients given sham (estimated ratio of geometric means, 0.20 [97.5% CI, 0.07 to 0.57];  $P < 0.001$ ). During the same time period,

the average pain intensity in patients receiving active stimulation was a mean  $\pm$  SD of  $1.1 \pm 1.1$  *versus*  $3.1 \pm 1.7$  in those given sham (difference in means from linear mixed effects model,  $-1.8$  [97.5% CI,  $-2.6$  to  $-0.9$ ];  $P < 0.001$ ). No interaction between treatment and postoperative day on Brief Pain Inventory average pain score was found ( $P = 0.18$ ). Because superiority (as well as noninferiority) was found on both primary outcomes, the joint null hypothesis was rejected, and active stimulation was concluded to be better than sham for pain management in the first 7 days (fig. 2). Sensitivity analyses on the primary outcomes gave treatment effect estimates very close to the primary analysis results (table 2).

### Treatment Effect Heterogeneity on Primary Outcomes

The treatment effect of stimulation *versus* sham on opioid consumption in the first 7 days did not vary significantly as a function of sex (interaction  $P = 0.61$ ) or surgical procedure (interaction  $P = 0.99$ ; table B, Supplemental Digital

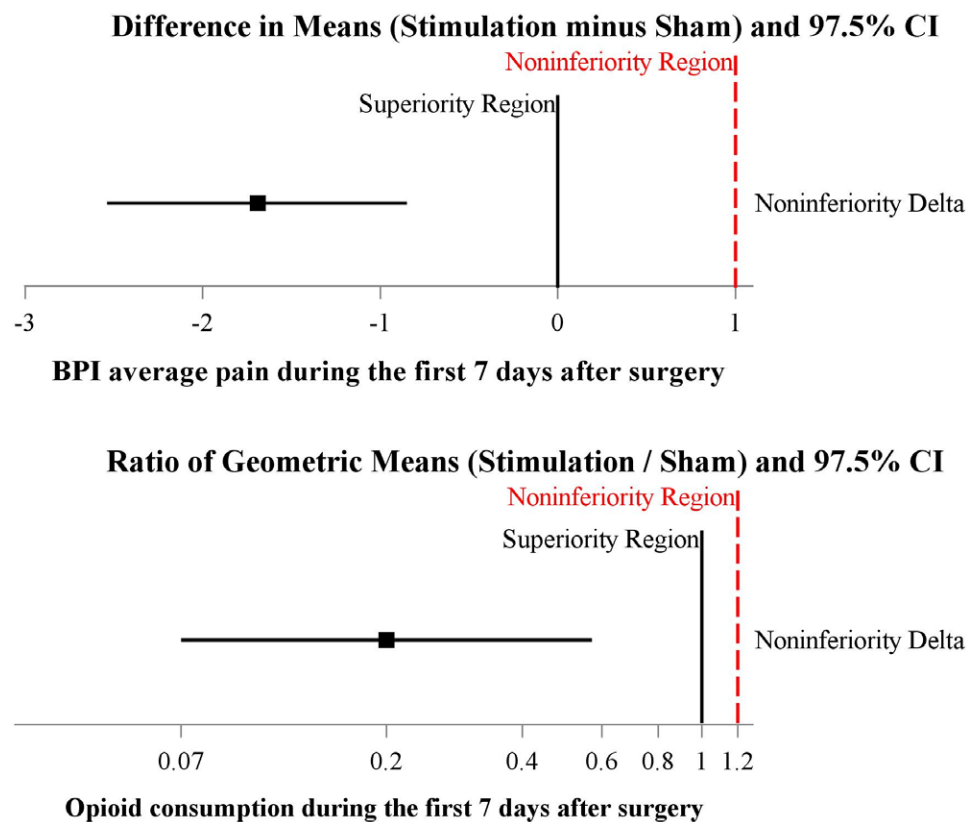

**Fig. 2.** Joint hypothesis testing of total opioid consumption and pain score primary outcomes during the initial 7 days postoperatively. The plot of mean difference of Brief Pain Inventory average pain score (*top*) and the ratio of geometric means of total opioid consumption (*bottom*). The mean difference (97.5% CI) of pain score on stimulation *versus* sham (placebo) was estimated from a repeated measures linear mixed model with an autoregressive correlation structure, adjusting for baseline Brief Pain Inventory average pain score and imbalanced surgical location. The ratios of geometric means of total opioid consumption were each estimated using a multivariable linear regression model adjusting for imbalanced surgical location. The stimulation was superior on pain and total opioid consumption (both superiority tests  $P < 0.001$ ) compared to the placebo group.

**Table 1.** Anthropometric, Demographic, Baseline, Lead Insertion, and Surgical Characteristics (n = 65)

|                                                        | Active (n = 31)  | Sham (Placebo; n = 34) | Absolute Standardized Difference |
|--------------------------------------------------------|------------------|------------------------|----------------------------------|
| Anthropometric                                         |                  |                        |                                  |
| Age, yr                                                | 56.8 ± 15.8      | 55.4 ± 15.9            | 0.084                            |
| Female                                                 | 15 (48)          | 17 (50)                | 0.032                            |
| Weight, kg                                             | 80 ± 16          | 86 ± 20                | 0.354                            |
| Body mass index, kg/m <sup>2</sup>                     | 27.0 ± 4.2       | 28.5 ± 5.4             | 0.289                            |
| Enrolling center*                                      |                  |                        |                                  |
| Cedars-Sinai                                           | 1 (3)            | 1 (3)                  |                                  |
| University of California-San Diego                     | 28 (90)          | 28 (82)                |                                  |
| Naval Medical Center San Diego                         | 0 (0)            | 1 (3)                  |                                  |
| Walter Reed                                            | 1 (3)            | 2 (6)                  |                                  |
| Womack Army Medical Center                             | 1 (3)            | 2 (6)                  |                                  |
| Defense and Veterans Pain Rating Scale                 | 4.0 [2.0–6.0]†   | 5.0 [2.0–6.0]‡         | 0.070                            |
| Brief Pain Inventory§                                  |                  |                        |                                  |
| Pain (Numeric Rating Scale)                            |                  |                        |                                  |
| Worst                                                  | 5.0 [3.0–7.0]    | 5.0 [2.0–7.0]          | 0.026                            |
| Average                                                | 2.5 [1.0–5.0]    | 3.0 [2.0–6.0]          | 0.288                            |
| Least                                                  | 0.0 [0.0–2.0]    | 0.0 [0.0–3.0]          | 0.039                            |
| Current                                                | 1.0 [0.0–3.0]    | 1.0 [0.0–3.0]          | 0.011                            |
| Total pain score (four scores combined)                | 9.5 [5.0–13.0]   | 11.0 [4.0–16.0]        | 0.085                            |
| Pain interference                                      |                  |                        |                                  |
| Total interference score                               | 16.0 [10.0–26.0] | 18.0 [8.0–32.0]        | 0.106                            |
| General activity                                       | 4.0 [2.0–6.0]    | 3.0 [1.0–6.0]          | 0.173                            |
| Mood                                                   | 0.5 [0.0–4.0]    | 2.0 [0.0–5.0]          | 0.226                            |
| Walking ability                                        | 1.0 [0.0–5.0]    | 2.0 [1.0–5.0]          | 0.363                            |
| Work (inside and outside of home)                      | 4.0 [1.0–5.0]    | 4.0 [1.0–6.0]          | 0.059                            |
| Relations with other people                            | 0.0 [0.0–1.0]    | 0.0 [0.0–3.0]          | 0.305                            |
| Sleep                                                  | 2.0 [0.0–5.0]    | 1.0 [0.0–4.0]          | 0.235                            |
| Enjoyment of life                                      | 2.0 [0.0–4.0]    | 2.0 [1.0–7.0]          | 0.197                            |
| World Health Organization Quality of Life Instrument   |                  |                        |                                  |
| Overall quality of life                                | 5.0 [4.0–5.0]    | 5.0 [3.0–5.0]#         | 0.268                            |
| General health of life                                 | 4.0 [4.0–4.0]†   | 4.0 [2.0–4.0]          | 0.364                            |
| Physical health                                        | 59 [46–68]†      | 57 [50–68]             | 0.104                            |
| Psychologic                                            | 63 [58–75]†      | 67 [58–79]             | 0.096                            |
| Social relations                                       | 75 [67–92]†      | 75 [67–100]            | 0.103                            |
| Environment                                            | 66 [56–69]†      | 66 [53–81]             | 0.032                            |
| Post-Traumatic Stress Disorder Checklist (C)           |                  |                        |                                  |
| Total score                                            | 0 [0–0]†         | 0 [0–0]                | 0.147                            |
| Severity (total score > 33)                            | 1 (3)†           | 2 (6)                  | 0.122                            |
| Lead insertion                                         |                  |                        |                                  |
| Current intensity                                      |                  |                        |                                  |
| Minimum sensed*                                        | 40 [32–48]       | 39 [34–56]             | 0.204                            |
| Maximum comfortable*                                   | 58 [48–70]       | 54 [40–68]             | 0.258                            |
| Maximum tolerated*                                     | 59 [50–72]†      | 54 [44–72]†            | 0.203                            |
| Muscle contraction                                     | 4 (13)           | 5 (15)                 | 0.052                            |
| Distance from skin, cm                                 | 2.8 [1.5–4.0]†   | 3.0 [1.8–5.0]†         | 0.212                            |
| Distance from epineurium, cm                           | 1.0 [0.5–1.0]†   | 0.9 [0.5–1.0]†         | 0.098                            |
| Insertion time (needle in/out), min                    | 15 [10–21]       | 15 [10–31]             | 0.192                            |
| Worst pain for lead insertion (Numeric Rating Scale)   | 3.0 [2.0–6.0]    | 4.0 [2.0–6.5]          | 0.085                            |
| Average pain for lead insertion (Numeric Rating Scale) | 1.0 [0.0–2.0]    | 1.5 [0.0–3.0]          | 0.241                            |
| Intraoperative factors                                 |                  |                        |                                  |
| Surgical procedure                                     |                  |                        | 0.455                            |
| Rotator cuff repair                                    | 13 (42)          | 8 (24)                 |                                  |
| Anterior cruciate ligament reconstruction              | 1 (3)            | 3 (9)                  |                                  |
| Ankle arthrodesis                                      | 4 (13)           | 7 (21)                 |                                  |
| Ankle arthroplasty                                     | 4 (13)           | 5 (15)                 |                                  |
| Hallux valgus                                          | 9 (29)           | 11 (32)                |                                  |
| Surgical side = left                                   | 10 (33)          | 19 (56)                | 0.490                            |
| General anesthetic                                     | 27 (87)          | 28 (82)                | 0.132                            |
| Duration of surgery, min                               | 88 ± 42          | 90 ± 36                | 0.040                            |
| Intravenous morphine equivalents, mg                   | 10 [8–10]        | 10 [5–10]              | 0.117                            |

Any variable with an absolute standardized difference > 0.487 was considered unbalanced. The data are reported as mean ± SD, median [quartiles], or number (percentage).

\*Totals not equal to 100% because of rounding error. †One missing data point. ‡Two missing data points. §One missing data point in each group. ||Twelve missing data points.

#Fourteen missing data points. \*\*The pulse generator intensity setting spans a range of 0 (no current) to 100 (maximum), indicating a combination of amplitude (0–30 mA) and pulse duration (10–133 µs), the specific combination of which at each intensity setting is proprietary and therefore unavailable for publication.



**Table 2.** Primary Outcomes Joint Hypothesis Testing: Noninferiority and Superiority Tests of the Stimulation Compared to Sham (Placebo)

| Primary Outcomes during Postoperative 7 Days | Stimulation (n = 31) | Sham (Placebo; n = 34) | Ratio of Geometric Means (Stimulation/Sham; 97.5% CI) | Noninferiority $\Delta$ | Noninferiority P Value* | Superiority P Value† |
|----------------------------------------------|----------------------|------------------------|-------------------------------------------------------|-------------------------|-------------------------|----------------------|
| Cumulative opioid consumption (mg)           | 5.0 [0 to 30]        | 48 [25 to 90]          | 0.2 (0.1 to 0.6)‡                                     | 1.2                     | < 0.001                 | < 0.001              |
| Sensitivity analysis§                        |                      |                        | 0.2 (0.1 to 0.5)§                                     |                         | < 0.001                 | < 0.001              |
| Sensitivity analysis                         |                      |                        | 0.2 (0.1 to 0.6)                                      |                         | < 0.001                 | < 0.001              |
| Sensitivity analysis#                        |                      |                        | −35 (−55 to −15)#                                     |                         |                         | < 0.001              |
| Brief Pain Inventory average pain score**    |                      |                        |                                                       |                         |                         |                      |
| Overall††                                    | 1.1 ± 1.1            | 3.1 ± 1.7              | −1.8 (−2.6 to −0.9)‡‡                                 | 1.0                     | < 0.001                 | < 0.001              |
| Sensitivity analysis§§                       | 1.1 ± 1.1            | 3.1 ± 1.7              | −1.9 (−2.7 to −1.1)§§                                 |                         | < 0.001                 | < 0.001              |
| Sensitivity analysis                         | 0.8 [0.1 to 1.6]     | 2.9 [2.0 to 4.4]       | −1.8 (−2.6 to −1.0)                                   |                         | < 0.001                 | < 0.001              |
| Treatment time†††                            |                      |                        |                                                       |                         |                         | 0.176***             |
| Postoperative day 1                          | 1.8 ± 1.8            | 4.0 ± 2.6              | −2.0 (−3.1 to −1.0)                                   |                         | < 0.001                 | < 0.001              |
| Postoperative day 2                          | 1.3 ± 1.4            | 3.9 ± 2.1              | −2.4 (−3.5 to −1.3)                                   |                         | < 0.001                 | < 0.001              |
| Postoperative day 3                          | 0.9 ± 1.2            | 3.1 ± 2.3              | −2.0 (−3.1 to −1.0)                                   |                         | < 0.001                 | < 0.001              |
| Postoperative day 4                          | 0.7 ± 1.2            | 2.3 ± 2.0              | −1.4 (−2.4 to −0.3)                                   |                         | < 0.001                 | 0.005                |
| Postoperative day 7                          | 0.6 ± 1.1            | 1.9 ± 2.1              | −1.1 (−2.2 to −0.1)                                   |                         | < 0.001                 | 0.018                |
| Sensitivity analysis†††                      |                      |                        |                                                       |                         |                         |                      |
| Postoperative day 1                          | 2 [0 to 3]           | 5 [1 to 6]             | −3 (−4 to −1)                                         |                         |                         | 0.001                |
| Postoperative day 2                          | 1 [0 to 2]           | 4 [3 to 5]             | −3 (−4 to −2)                                         |                         |                         | < 0.001              |
| Postoperative day 3                          | 0 [0 to 2]           | 3 [2 to 4]             | −2 (−3 to −1)                                         |                         |                         | < 0.001              |
| Postoperative day 4                          | 0 [0 to 1]           | 2 [1 to 3]             | −2 (−2 to −1)                                         |                         |                         | < 0.001              |
| Postoperative day 7                          | 0 [0 to 1]           | 2 [0 to 3]             | −1 (−2 to 0)                                          |                         |                         | 0.002                |

The data are presented as mean ± SD or median [quartiles].

\*Noninferiority P value obtained from a one-tailed t test using a test statistic defined as  $T_{NI} = \frac{\hat{\beta}_1 - \delta}{SE_{\hat{\beta}_1}}$ , where  $\hat{\beta}_1$  is the estimated treatment effect,  $SE_{\hat{\beta}_1}$  is the standard error of

the treatment effect from primary analyses, and  $\delta$  is the noninferiority  $\delta$  (i.e., 1-point Numeric Rating Scale score); significant if  $P < 0.025$ . †Significant if  $P < 0.025$  using Bonferroni correction (i.e.,  $\alpha = 0.05/2 = 0.025$  for two primary outcomes). ‡Ratio of means (97.5% CI) of the stimulation versus sham (placebo) was estimated from a multiple regression adjusting for imbalanced surgical location. §Without adjusting for surgical location. ||Adjusting for surgical location and surgical type. #Median difference was estimated from Wilcoxon rank sum test adjusted for surgical location and the Hodges–Lehmann estimator of location shift between groups. \*\*Mean difference (97.5% CI) of the stimulation versus sham (placebo) was estimated from a repeated measures linear mixed model with an autoregressive correlation structure. ††Average postoperative 7 days within each patient first and then summarized overall mean and median by groups. ‡‡Adjusting for baseline Brief Pain Inventory average pain score and imbalanced surgical location. §§Adjusting for baseline Brief Pain Inventory average pain score only. |||Adjusting for baseline Brief Pain Inventory average pain score, surgical location, and surgical type. ###Interaction model (i.e., treatment × time) adjusting for baseline Brief Pain Inventory average pain score and imbalanced surgical location, and mean difference (97.5% CI) at each day was estimated from the interaction effect model. \*\*\*Because no group-by-time interaction was found, no Bonferroni correction was made for assessing treatment effect at each time point. †††Median difference was estimated from

Wilcoxon rank sum test adjusted for surgical location and the Hodges–Lehmann estimator of location shift between groups.  $T_{NI} = \frac{\hat{\beta}_1 - \delta}{SE_{\hat{\beta}_1}}$ .

Content 2, <http://links.lww.com/ALN/C595>). Likewise, the treatment effect on the average pain score during the first 7 days did not vary as a function of sex (interaction  $P = 0.52$ ) or surgical procedure (interaction  $P = 0.63$ ) in a linear mixed effects model.

## Secondary Outcomes

Worst, average, and current pain scores (fig. 3), as well as opioid consumption (fig. 4), were significantly lower for participants receiving stimulation on all individual days while the leads were in place (Supplemental Digital Content 3 through 8, tables C through H [<http://links.lww.com/ALN/C596>, <http://links.lww.com/ALN/C597>, <http://links.lww.com/ALN/C598>, <http://links.lww.com/ALN/C599>, <http://links.lww.com/ALN/C600>, <http://links.lww.com/ALN/C601>]), without correction for multiple testing (figs. 3 and 4; Supplemental Digital Content 9, figure 6 [<http://links.lww.com/ALN/C602>]). Participants who received active treatment had less physical and emotional interference caused by pain during the treatment phase, as well as the day after lead removal (fig. 5). Few statistically significant

differences between treatments were identified at 1 and 4 months, although one notable exception was the complete lack of opioids required by participants of the stimulation group compared with six participants in the control group still taking opioids ( $P = 0.025$ ; Supplemental Digital Content 6 [<http://links.lww.com/ALN/C599>] and 7 [<http://links.lww.com/ALN/C600>], tables F and G).

## Assessment of Blinding

Among 64 participants with a recorded response, 61 (95%) either believed they were receiving active treatment or did not know to which group they were randomized. Among the three participants who believed they were receiving sham treatment, two had actually received active treatment. Thus, only a single person in the sham group accurately predicted their group assignment.

## Adverse Events and Protocol Deviations

One pulse generator stopped functioning the day after surgery and was replaced. One subject with a sciatic lead

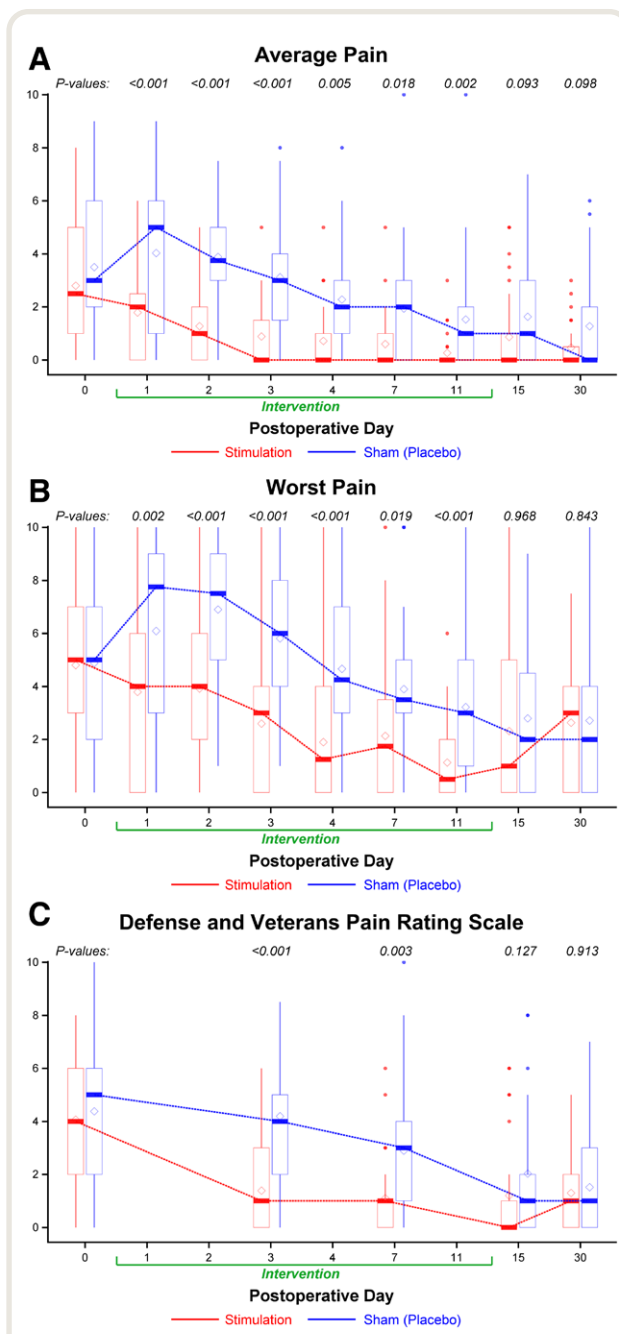

**Fig. 3.** Effects of 14 days of percutaneous peripheral nerve stimulation on pain. Pain severity is indicated using a Numeric Rating Scale (A and B) or the Defense and Veterans Pain Rating Scale (C) with 0 equal to no pain and 10 being the worst imaginable pain. For scores during the initial 7 postoperative days, the *P* values were estimated from repeated measures linear mixed effects model with an autoregressive correlation structure, adjusting for baseline scores and imbalanced surgical location; for postoperative days 11 and 15, the *P* values were estimated from the Wilcoxon rank sum test stratified by surgical location. For month 1, the *P* values were estimated from multivariable linear regression models adjusting for baseline scores and surgical location. The data are expressed as medians (dark horizontal bars) with 25th to 75th percentiles (box), 10th to 90th percentiles (whiskers), means (diamonds), and outliers (circles).

withdrew on postoperative day 3 because of unpleasant sensations in the sciatic nerve distribution (he refused to decrease the level of current intensity). One subject developed erythema under the dressing that resolved after dressing removal (the lead was left *in situ* and affixed with paper tape by the patient). The leads of two participants fractured during intentional removal.

## Discussion

This multicenter, randomized, double-masked, sham-controlled pilot study provides evidence that ultrasound-guided percutaneous peripheral nerve stimulation concurrently improves analgesia and decreases opioid requirements to a statistically significant and clinically meaningful degree for at least a week after moderately to severely painful ambulatory orthopedic surgery. Secondary endpoints suggest that some analgesic and opioid benefits continued beyond lead removal on postoperative day 14. Pain's interference with emotional and physical functioning was also decreased during the 2-week intervention and the day after lead removal; however, there appeared to be little residual benefit at months 1 and 4.

Various factors favor percutaneous peripheral nerve stimulation over opioid- or local anesthetic-based analgesics. Neuromodulation avoids the systemic side effects related to opioid use such as nausea, sedation, and respiratory depression; it also has no potential for abuse, addiction, and diversion.<sup>42</sup> Unlike single-injection and continuous peripheral nerve blocks, neuromodulation induces no proprioception, sensory, or motor deficits<sup>16,18</sup> and therefore should not decrease the ability to participate in postoperative rehabilitation or increase the risk of falling.<sup>43</sup> The risk of infection for helically coiled leads is significantly lower than for perineural catheters and reported to be fewer than 1 per 32,000 indwelling days.<sup>44,45</sup> Small pulse generators combined with rechargeable batteries allow treatment without the patient burden of carrying an infusion pump and local anesthetic reservoir. These attributes support prolonged application. For example, the leads used in this trial are Food and Drug Administration–approved for up to 60 days, thus providing analgesia that substantially outlasts the duration of acute pain after most operations. An additional consideration is that the leads and introducers are positioned 1 to 2 cm from the target nerve, unlike for peripheral nerve block administration and perineural catheter insertion, thus reducing the risk of needle-to-nerve contact and possible neurologic injury.

The limitations of percutaneous peripheral nerve stimulation include a lack of surgical block or analgesia as potent as a single-injection local anesthetic-based peripheral nerve block.<sup>16–18</sup> Consequently, we administered a single-injection peripheral nerve block with long-acting local anesthetic after lead implantation and immediately before the surgical start. The insertion time of electric leads is also a concern, with initial reports requiring significant time

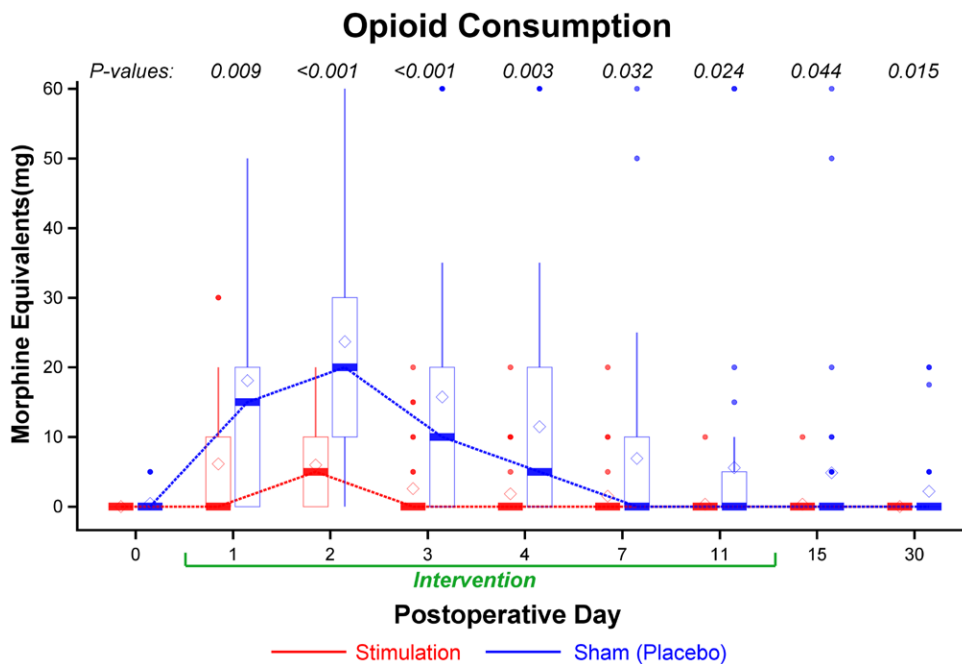

**Fig. 4.** Effects of 14 days of percutaneous peripheral nerve stimulation on opioid consumption (oral morphine equivalents). For the opioid consumption within 24 h at each time point, the *P* values were estimated from the Wilcoxon rank test (skewed data) stratified by surgical location. The data are expressed as medians (dark horizontal bars) with 25th to 75th percentiles (box), 10th to 90th percentiles (whiskers), means (diamonds), and outliers (circles).

for this procedure.<sup>16–18</sup> However, the insertion time for the current study decreased with the use of improved equipment and with increasing experience (table 1). Although still longer than perineural catheter insertion times,<sup>46,47</sup> the decreased lead implantation time that came with increased experience allowed the majority of participants of the current study to have their leads inserted the morning of surgery and avoid an additional visit to the surgical center on a previous day.

Based on previously reported series involving acute pain, the most concerning technical challenges have been lead dislodgment (9%) and fracture (20%) either during use or removal.<sup>15–18</sup> However, among the 66 participants of our trial, there were no inadvertent lead dislodgments or fractures during use, and only two (3%) fractures during intentional withdrawal. Although speculative, lack of dislodgment might be attributed to the use of surgical glue at the point of lead entry, and the decrease in fractures (20% to 3%) might be attributed to more gentle traction during removal. In previous and current cases, fractured lead remnants were left *in situ* with no negative sequelae reported within the next year.<sup>10</sup> Notably, magnetic resonance imaging remains safe with retained lead fragments of up to 12.7 cm—the maximum possible—at 1.5 Tesla.<sup>48</sup> In practice, most fractures have occurred at or near the tip of the lead, leaving less than 2 cm of retained wire.<sup>48</sup>

An important—and somewhat surprising—finding was the successful masking of treatment group assignments: all but three individuals (one in the sham treatment group and two in the active treatment group) either believed they were receiving active stimulation or were unsure of their treatment. All patients experienced active stimulation during lead implantation, and we therefore anticipated many who subsequently received sham to conclude they were, in fact, randomized to the placebo. The main cause of masking retention appeared to be the instruction that individuals should decrease the current if they experienced muscle contractions. Nearly all participants reported multiple cases daily of what they perceived as muscle contractions and decreased their stimulation level accordingly. Nearly complete masking increases confidence in our results and strongly suggests that the observed impressive treatment effect was not due to placebo effect.

Our trial was *a priori* designated a pilot study because it was undertaken to plan for a subsequent randomized trial by (1) determining the feasibility of and optimizing the study protocol and (2) estimating the treatment effect to adequately power the future investigation. Our study was thus a true pilot trial with correctly specified *a priori* pilot objectives. Importantly, the label “pilot” in no way lessens the veracity or validity of the results: what the findings are used for (*e.g.*, power estimation for an immediately subsequent

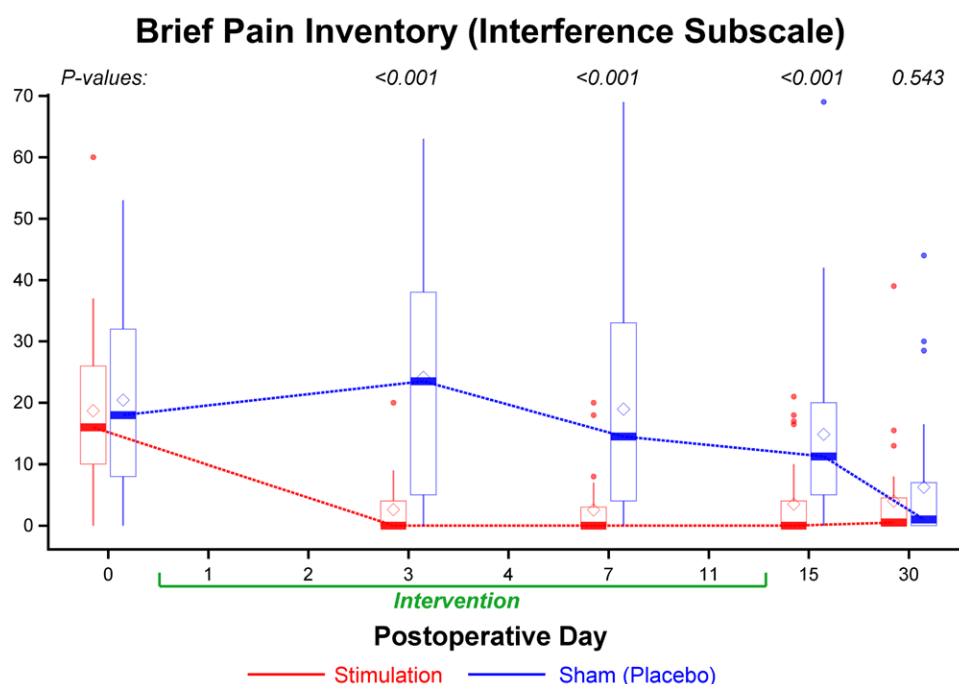

**Fig. 5.** Effects of 14 days of percutaneous peripheral nerve stimulation on the Brief Pain Inventory interference domain. Pain interference is indicated using a Numeric Rating Scale of 0 to 70, with 0 and 70 equal to no and maximal interference, respectively. During postoperative days 3 and 7, the *P* values were estimated from repeated measures linear mixed model with an autoregressive correlation structure, adjusting for baseline values and imbalanced surgical location. For postoperative day 15, the *P* values were estimated from the Wilcoxon rank test (skewed data) stratified by surgical location. For 1 month, the *P* values were estimated from multivariable linear regression models adjusting for baseline values and surgical location. The data are expressed as pain's interference in either the total or each of the seven components (higher scores = more interference) demarked as median (dark horizontal bars) with 25th to 75th percentiles (box), 10th to 90th percentiles (whiskers), means (diamonds), and outliers (circles).

larger trial) does not change the findings themselves. In fact, the treatment effect was much greater than what we had anticipated, concurrently reducing opioid consumption by 80% and pain scores by more than 50%. Consequently, the results were highly statistically significant, with both *P* values < 0.001. Our results thus stand on their own and indicate that percutaneous peripheral nerve stimulation is highly effective for acute pain.

A primary aim of our pilot trial was to evaluate the feasibility of a subsequent larger trial and to optimize the protocol. The former is now answered in the affirmative. Based on our experience, we plan to (1) decrease the future sample size from the originally planned 528 to 250 based on larger than anticipated effect sizes; (2) remove two treatment centers because of a lack of enrollment; (3) exclude anterior cruciate ligament reconstruction because of an inadequate volume of patellar autograft procedures at the enrolling centers; (4) call participants the evening of surgery to review the protocol and answer questions; (5) add a 12-month time point for detection of longer-term benefits and adverse events such as conversion of acute to chronic pain; and (6) define the stepwise gatekeeping order of outcome measures. Statistical

method differences will include (1) incorporating interim analyses for assessment of efficacy and futility; (2) incorporating an internal pilot study to reassess outcome variability at 50% of the planned enrollment; and (3) including a more thorough assessment of treatment effect heterogeneity as a function of prespecified baseline factors.

In conclusion, percutaneous peripheral nerve stimulation reduced pain scores and opioid requirements free of systemic side effects during at least the initial week after ambulatory orthopedic surgery. Our results confirm feasibility of a future larger trial and suggest protocol enhancements.

### Acknowledgments

The authors appreciate the invaluable assistance of Jeffrey Mills, B.A. (Clinical Translational Research Center, University of California–San Diego, San Diego, California). This article is a product of the National Institutes of Health (Bethesda, Maryland)–Department of Defense (Arlington, Virginia)–Department of Veterans Affairs (Washington, D.C.) Pain Management Collaboratory. For more information about the Collaboratory, go to <http://www.painmanagementcollaboratory.org>.



## Research Support

Supported by the Assistant Secretary of Defense for Health Affairs endorsed by the Department of Defense, through the Pain Management Collaboratory—Pragmatic Clinical Trials Demonstration Projects under awards W81XWH-18-2-0003, W81XWH-18-2-0007, W81XWH-18-2-0008, and W81XWH-18-2-0009. The research reported in this publication was made possible by grant U24 AT009769 from the National Center for Complementary and Integrative Health (Bethesda, Maryland) and the Office of Behavioral and Social Sciences Research (Bethesda, Maryland). Opinions, interpretations, conclusions, and recommendations are those of the authors and are not necessarily endorsed by the funding agencies. This article is a product of the National Institutes of Health—Department of Defense—Department of Veterans Affairs Pain Management Collaboratory.

## Competing Interests

Dr. Gelfand participates in the Henry Jackson Foundation (Bethesda, Maryland) funded research through a grant from Pacira Pharmaceuticals (Parsippany, New Jersey). Dr. Ilfeld's institution has received funding for other research from Infutronic (Natick, Massachusetts), Epimed International (Farmers Branch, Texas), and SPR Therapeutics, Inc. (Cleveland, Ohio). Dr. Cohen's institution has received funding from the following companies to support his research: Scilex Technology (Santa Ana, California), Persica (North York, Ontario, Canada), SPR Therapeutics, Inc., and Avanos (Alpharetta, Georgia). Dr. Sessler is a consultant for Pacira Pharmaceuticals, and Dr. Sessler's institution receives funding from Pacira Pharmaceuticals and Heron Therapeutics (San Diego, California). Dr. Turan's institution receives funding from Pacira Pharmaceuticals and Heron Therapeutics. Dr. Boggs and Dr. Wongsarnpigoon are employees of SPR Therapeutics, Inc., the manufacturer of the electrical leads and pulse generators under investigation in this study. Both authors own stock options in this company. Of note, this was an investigator-initiated project fully funded by the U.S. Department of Defense, and Dr. Ilfeld retained complete control of the grant proposal; study protocol; data collection, analysis, and interpretation; and the resulting manuscript. Drs. Boggs and Wongsarnpigoon were provided the initial protocol on which to comment, with some suggested revisions incorporated into the protocol, while others were not. The other authors declare no competing interests.

## Reproducible Science

Full protocol available at: [bilfeld@health.ucsd.edu](mailto:bilfeld@health.ucsd.edu). Raw data available at: [bilfeld@health.ucsd.edu](mailto:bilfeld@health.ucsd.edu).

## Correspondence

Address correspondence to Dr. Ilfeld: 9500 Gilman Drive, MC 0898, La Jolla, California 92093-0898. [bilfeld@health.ucsd.edu](mailto:bilfeld@health.ucsd.edu). This article may be accessed for

personal use at no charge through the Journal Web site, [www.anesthesiology.org](http://www.anesthesiology.org).

## References

1. Cullen KA, Hall MJ, Golosinskiy A: Ambulatory surgery in the United States, 2006. *Natl Health Stat Report* 2009; 28:1–25
2. Correll DJ, Vlassakov KV, Kissin I: No evidence of real progress in treatment of acute pain, 1993–2012: Scientometric analysis. *J Pain Res* 2014; 7:199–210
3. Apfelbaum JL, Chen C, Mehta SS, Gan TJ: Postoperative pain experience: Results from a national survey suggest postoperative pain continues to be undermanaged. *Anesth Analg* 2003; 97:534–40
4. Ilfeld BM, Vandenborne K, Duncan PW, Sessler DI, Enneking FK, Shuster JJ, Theriaque DW, Chmielewski TL, Spadoni EH, Wright TW: Ambulatory continuous interscalene nerve blocks decrease the time to discharge readiness after total shoulder arthroplasty: A randomized, triple-masked, placebo-controlled study. *ANESTHESIOLOGY* 2006; 105:999–1007
5. Kehlet H, Jensen TS, Woolf CJ: Persistent postsurgical pain: Risk factors and prevention. *Lancet* 2006; 367:1618–25
6. Dahan A, Aarts L, Smith TW: Incidence, reversal, and prevention of opioid-induced respiratory depression. *ANESTHESIOLOGY* 2010; 112:226–38
7. Chidambaram V, Olbrecht V, Hossain M, Sadhasivam S, Rose J, Meyer MJ: Risk predictors of opioid-induced critical respiratory events in children: Naloxone use as a quality measure of opioid safety. *Pain Med* 2014; 15:2139–49
8. Sun EC, Darnall BD, Baker LC, Mackey S: Incidence of and risk factors for chronic opioid use among opioid-naïve patients in the postoperative period. *JAMA Intern Med* 2016; 176:1286–93
9. Ilfeld BM, Finneran JJ: Cryoneurolysis and percutaneous peripheral nerve stimulation to treat acute pain. *ANESTHESIOLOGY* 2020; 133:1127–49
10. Ilfeld BM, Grant SA: Ultrasound-guided percutaneous peripheral nerve stimulation for postoperative analgesia: Could neurostimulation replace continuous peripheral nerve blocks? *Reg Anesth Pain Med* 2016; 41:720–2
11. Huntoon MA, Burgher AH: Ultrasound-guided permanent implantation of peripheral nerve stimulation (PNS) system for neuropathic pain of the extremities: Original cases and outcomes. *Pain Med* 2009; 10:1369–77
12. Deer TR, Mekhail N, Provenzano D, Pope J, Krames E, Leong M, Levy RM, Abejon D, Buchser E, Burton A, Buvaendran A, Candido K, Caraway D, Cousins M, DeJongste M, Diwan S, Eldabe S, Gatzinsky K, Foreman RD, Hayek S, Kim P, Kinfe T, Kloth D, Kumar K, Rizvi

- S, Lad SP, Liem L, Linderroth B, Mackey S, McDowell G, McRoberts P, Poree L, Prager J, Raso L, Rauck R, Russo M, Simpson B, Slavin K, Staats P, Stanton-Hicks M, Verrills P, Wellington J, Williams K, North R; Neuromodulation Appropriateness Consensus Committee: The appropriate use of neurostimulation of the spinal cord and peripheral nervous system for the treatment of chronic pain and ischemic diseases: The Neuromodulation Appropriateness Consensus Committee. *Neuromodulation* 2014; 17:515–50
13. Ilfeld BM, Gilmore CA, Grant SA, Bolognesi MP, Del Gaizo DJ, Wongsarnpigoon A, Boggs JW: Ultrasound-guided percutaneous peripheral nerve stimulation for analgesia following total knee arthroplasty: A prospective feasibility study. *J Orthop Surg Res* 2017; 12:4
  14. Ilfeld BM, Grant SA, Gilmore CA, Chae J, Wilson RD, Wongsarnpigoon A, Boggs JW: Neurostimulation for postsurgical analgesia: A novel system enabling ultrasound-guided percutaneous peripheral nerve stimulation. *Pain Pract* 2017; 17:892–901
  15. Ilfeld BM, Ball ST, Gabriel RA, Sztain JF, Monahan AM, Abramson WB, Khatibi B, Said ET, Parekh J, Grant SA, Wongsarnpigoon A, Boggs JW: A feasibility study of percutaneous peripheral nerve stimulation for the treatment of postoperative pain following total knee arthroplasty. *Neuromodulation* 2019; 22:653–60
  16. Ilfeld BM, Gabriel RA, Said ET, Monahan AM, Sztain JF, Abramson WB, Khatibi B, Finneran JJ IV, Jaeger PT, Schwartz AK, Ahmed SS: Ultrasound-guided percutaneous peripheral nerve stimulation: Neuromodulation of the sciatic nerve for postoperative analgesia following ambulatory foot surgery, a proof-of-concept study. *Reg Anesth Pain Med* 2018; 43:580–9
  17. Ilfeld BM, Said ET, Finneran JJ 4th, Sztain JF, Abramson WB, Gabriel RA, Khatibi B, Swisher MW, Jaeger P, Covey DC, Robertson CM: Ultrasound-guided percutaneous peripheral nerve stimulation: Neuromodulation of the femoral nerve for postoperative analgesia following ambulatory anterior cruciate ligament reconstruction: A proof of concept study. *Neuromodulation* 2019; 22:621–9
  18. Ilfeld BM, Finneran JJt, Gabriel RA, Said ET, Nguyen PL, Abramson WB, Khatibi B, Sztain JF, Swisher MW, Jaeger P, Covey DC, Meunier MJ, Hentzen ER, Robertson CM: Ultrasound-guided percutaneous peripheral nerve stimulation: Neuromodulation of the suprascapular nerve and brachial plexus for postoperative analgesia following ambulatory rotator cuff repair. A proof-of-concept study. *Reg Anesth Pain Med* 2019; 44:310–8
  19. Shamji MF, DeVos C, Sharan A: The advancing role of neuromodulation for the management of chronic treatment: Refractory pain. *Neurosurgery* 2017; 80(3S):108–13
  20. Ilfeld BM, Gelfand H, Dhanjal S, Hackworth R, Plunkett A, Turan A, Vijjeswarapu AM, Cohen SP, Eisenach JC, Griffith S, Hanling S, Mascha EJ, Sessler DI: Ultrasound-guided percutaneous peripheral nerve stimulation: A pragmatic effectiveness trial of a non-pharmacologic alternative for the treatment of postoperative pain. *Pain Med* 2020; 21(suppl 2):53–61
  21. Ristić D, Spangenberg P, Ellrich J: Analgesic and antinociceptive effects of peripheral nerve neurostimulation in an advanced human experimental model. *Eur J Pain* 2008; 12:480–90
  22. Dworkin RH, Turk DC, Peirce-Sandner S, Baron R, Bellamy N, Burke LB, Chappell A, Chartier K, Cleeland CS, Costello A, Cowan P, Dimitrova R, Ellenberg S, Farrar JT, French JA, Gilron I, Hertz S, Jadad AR, Jay GW, Kalliomäki J, Katz NP, Kerns RD, Manning DC, McDermott MP, McGrath PJ, Narayana A, Porter L, Quessy S, Rappaport BA, Rauschkolb C, Reeve BB, Rhodes T, Sampaio C, Simpson DM, Stauffer JW, Stucki G, Tobias J, White RE, Witter J: Research design considerations for confirmatory chronic pain clinical trials: IMMPACT recommendations. *Pain* 2010; 149:177–93
  23. Bliese PD, Wright KM, Adler AB, Cabrera O, Castro CA, Hoge CW: Validating the primary care posttraumatic stress disorder screen and the posttraumatic stress disorder checklist with soldiers returning from combat. *J Consult Clin Psychol* 2008; 76:272–81
  24. Yeager DE, Magruder KM, Knapp RG, Nicholas JS, Frueh BC: Performance characteristics of the posttraumatic stress disorder checklist and SPAN in Veterans Affairs primary care settings. *Gen Hosp Psychiatry* 2007; 29:294–301
  25. Dobie DJ, Kivlahan DR, Maynard C, Bush KR, McFall M, Epler AJ, Bradley KA: Screening for post-traumatic stress disorder in female Veteran's Affairs patients: Validation of the PTSD checklist. *Gen Hosp Psychiatry* 2002; 24:367–74
  26. Keen SM, Kutter CJ, Niles BL, Krinsley KE: Psychometric properties of PTSD Checklist in sample of male veterans. *J Rehabil Res Dev* 2008; 45:465–74
  27. Freedy JR, Steenkamp MM, Magruder KM, Yeager DE, Zoller JS, Hueston WJ, Carek PJ: Post-traumatic stress disorder screening test performance in civilian primary care. *Fam Pract* 2010; 27:615–24
  28. Gammaitoni AR, Fine P, Alvarez N, McPherson ML, Bergmark S: Clinical application of opioid equianalgesic data. *Clin J Pain* 2003; 19:286–97
  29. Rowbotham M, Harden N, Stacey B, Bernstein P, Magnus-Miller L: Gabapentin for the treatment of postherpetic neuralgia: A randomized controlled trial. *JAMA* 1998; 280:1837–42
  30. Gilron I, Jensen MP: Clinical trial methodology of pain treatment studies: Selection and measurement of self-report primary outcomes for efficacy. *Reg Anesth Pain Med* 2011; 36:374–81
  31. Lundeberg T, Lund I, Dahlin L, Borg E, Gustafsson C, Sandin L, Rosén A, Kowalski J, Eriksson SV: Reliability

- and responsiveness of three different pain assessments. *J Rehabil Med* 2001; 33:279–83
32. Cleeland CS, Ryan KM: Pain assessment: Global use of the Brief Pain Inventory. *Ann Acad Med Singap* 1994; 23:129–38
  33. Turk DC, Dworkin RH, Burke LB, Gershon R, Rothman M, Scott J, Allen RR, Atkinson HJ, Chandler J, Cleeland C, Cowan P, Dimitrova R, Dionne R, Farrar JT, Haythornthwaite JA, Hertz S, Jadad AR, Jensen MP, Kellstein D, Kerns RD, Manning DC, Martin S, Max MB, McDermott MP, McGrath P, Moulin DE, Nurmikko T, Quessy S, Raja S, Rappaport BA, Rauschkolb C, Robinson JP, Royal MA, Simon L, Stauffer JW, Stucki G, Tollett J, von Stein T, Wallace MS, Wernicke J, White RE, Williams AC, Witter J, Wyrwich KW: Developing patient-reported outcome measures for pain clinical trials: IMMPACT recommendations. *Pain* 2006; 125:208–15
  34. Ackerman IN, Graves SE, Bennell KL, Osborne RH: Evaluating quality of life in hip and knee replacement: Psychometric properties of the World Health Organization Quality of Life short version instrument. *Arthritis Rheum* 2006; 55:583–90
  35. The World Health Organization Quality of Life assessment (WHOQOL): Position paper from the World Health Organization. *Soc Sci Med* 1995; 41:1403–9
  36. Saxena S, Orley J; WHOQOL Group: Quality of life assessment: The World Health Organization perspective. *Eur Psychiatry* 1997; 12(suppl 3):263s–6s
  37. Austin PC: Balance diagnostics for comparing the distribution of baseline covariates between treatment groups in propensity-score matched samples. *Stat Med* 2009; 28:3083–107
  38. Mascha EJ, Turan A: Joint hypothesis testing and gate-keeping procedures for studies with multiple end-points. *Anesth Analg* 2012; 114:1304–17
  39. Gerbershagen HJ, Rothaug J, Kalkman CJ, Meissner W: Determination of moderate-to-severe postoperative pain on the numeric rating scale: A cut-off point analysis applying four different methods. *Br J Anaesth* 2011; 107:619–26
  40. Wright A, Hannon J, Hegedus EJ, Kavchak AE: Clinimetrics corner: A closer look at the minimal clinically important difference (MCID). *J Man Manip Ther* 2012; 20:160–6
  41. Myles PS, Myles DB, Gallagher W, Boyd D, Chew C, MacDonald N, Dennis A: Measuring acute postoperative pain using the visual analog scale: The minimal clinically important difference and patient acceptable symptom state. *Br J Anaesth* 2017; 118:424–9
  42. Kharasch ED, Brunt LM: Perioperative opioids and public health. *ANESTHESIOLOGY* 2016; 124:960–5
  43. Ilfeld BM, Duke KB, Donohue MC: The association between lower extremity continuous peripheral nerve blocks and patient falls after knee and hip arthroplasty. *Anesth Analg* 2010; 111:1552–4
  44. Ilfeld BM, Gabriel RA, Saulino MF, Chae J, Peckham PH, Grant SA, Gilmore CA, Donohue MC, deBock MG, Wongsarnpigoon A, Boggs JW: Infection rates of electrical leads used for percutaneous neurostimulation of the peripheral nervous system. *Pain Pract* 2017; 17:753–62
  45. Capdevila X, Bringuier S, Borgeat A: Infectious risk of continuous peripheral nerve blocks. *ANESTHESIOLOGY* 2009; 110:182–8
  46. Mariano ER, Cheng GS, Choy LP, Loland VJ, Bellars RH, Sandhu NS, Bishop ML, Lee DK, Maldonado RC, Ilfeld BM: Electrical stimulation *versus* ultrasound guidance for popliteal-sciatic perineural catheter insertion: A randomized controlled trial. *Reg Anesth Pain Med* 2009; 34:480–5
  47. Mariano ER, Loland VJ, Sandhu NS, Bishop ML, Meunier MJ, Afra R, Ferguson EJ, Ilfeld BM: A trainee-based randomized comparison of stimulating interscalene perineural catheters with a new technique using ultrasound guidance alone. *J Ultrasound Med* 2010; 29:329–36
  48. Shellock FG, Zare A, Ilfeld BM, Chae J, Strother RB: *In vitro* magnetic resonance imaging evaluation of fragmented, open-coil, percutaneous peripheral nerve stimulation leads. *Neuromodulation* 2018; 21:276–83

## Appendix 1: Data Safety Monitoring Board (Uncompensated)

Steven Shafer, M.D. (chair and medical monitor), Stanford University, Stanford, California; Pamela Flood, M.D., Stanford University; Jarrod Dalton, Ph.D. (statistician), Cleveland Clinic, Cleveland, Ohio.

## Appendix 2: Enrolling Center Investigators (PAINfRE Investigators)

Brooke Army Medical Center, Fort Sam Houston, Texas: Elizabeth Salazar, B.S.; Cedars-Sinai Medical Center, Los Angeles, California: Daniel Chien, M.D., Katherine Kobayashi, B.S., Christopher Massey, M.D., M.P.H., Tiffany Pouladar, M.D., Michael A. Stone, M.D., David Blake Thordarson, M.D., Tina Vajdi, M.D., Wendy Weissberg, B.S., B.A., C.C.R.P.; Cleveland Clinic, Cleveland, Ohio: Andrew Lucic, M.D.; Naval Medical Center San Diego, San Diego, California: Rick Fisher, D.O., Ian Fowler, M.D., Lucas S. McDonald, M.D., Anthony Scherschel, M.D., Marisa Kinnally, B.S.; Palo Alto Veterans Affairs, Palo Alto, California: Edward R. Mariano, M.D., M.A.S.; University of California-San Diego, San Diego, California: Baharin Abdullah, M.D. (National Program Manager), David J. Dalstrom, M.D., John J. Finneran IV, M.D. (conflict of interest: Epimed, Farmers Branch, Texas, research funding; Infutronics, Natick, Massachusetts, research funding; and



SPR Therapeutics, Inc., Cleveland, Ohio, research funding for other projects); Rodney A. Gabriel, M.D., M.A.S. (conflict of interest: Epimed, research funding; Infutronics, research funding; and SPR Therapeutics, Inc., research funding for other projects); Matthew J. Meunier, M.D., Catherine M. Robertson, M.D., Engy T. Said, M.D. (conflict of interest: Epimed, research funding; Infutronics, research funding; and SPR Therapeutics, Inc., research funding for other projects),

Matthew W. Swisher, M.D., M.S. (conflict of interest: Epimed, research funding; Infutronics, research funding; and SPR Therapeutics, Inc., research funding for other projects); Walter Reed National Military Medical Center, Bethesda, Maryland: Robert Burch, M.D., Kyle Cyr, M.D., Jeremy Dublon, D.P.M., Morgan Hunt, B.S., Dylan V. Scarton, M.S., Megan Tsui, B.S.; and Womack Army Medical Center, Fort Bragg, North Carolina: Elizabeth Dennison, M.S.

## ANESTHESIOLOGY REFLECTIONS FROM THE WOOD LIBRARY-MUSEUM

# Foregger's Autogenor: Revitalized Air for Athletes and Anesthesia

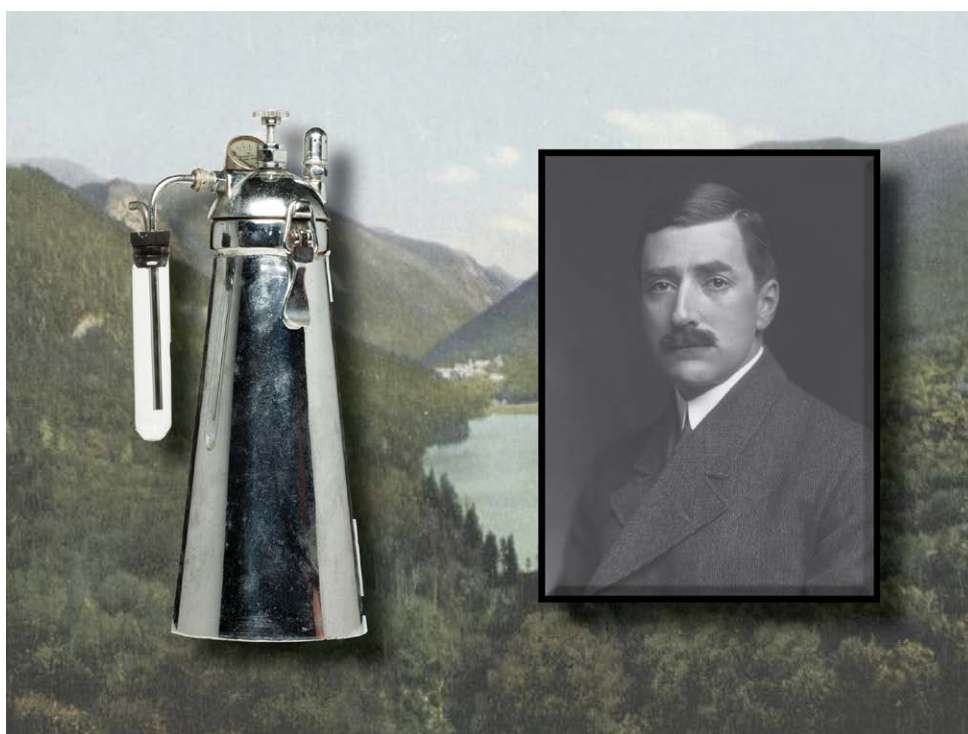

A century after two chemists—the German-Swedish Scheele and the English Priestley—independently discovered oxygen, future Austrian-American scientist Richard von Foregger (1872 to 1960, *right*) was born. As a young boy who grew breathless while racing through the Vienna woods, Foregger developed an early interest in oxygen. He remained athletic while studying chemistry in Europe, fencing frequently and swimming competitively in the 1900 Olympics. In 1772, Priestley discovered that mouse and flame could survive in an airtight jar when placed inside with a mint sprig exposed to sunlight. Similarly, in 1906, Foregger found that a man and a fluffle of rabbits could last in a sealed box for six and fifteen hours, respectively, alongside an oxygen regenerator of his own design. The secret ingredient was fused sodium peroxide, which when exposed to water, could generate both oxygen and sodium hydroxide, a carbon-dioxide absorber. This life-sustaining device quickly evolved into the coffee-pot-like Autogenor (1908, *left*). Anesthesiologist and fellow athlete James Tayloe Gwathmey, once a circus acrobat, helped Foregger document the Autogenor's success first with marathoners and mountain climbers, and then with anesthetized patients. (Copyright © the American Society of Anesthesiologists' Wood Library-Museum of Anesthesiology, Schaumburg, Illinois.)

*Jane S. Moon, M.D., University of California, Los Angeles, California, and Melissa L. Coleman, M.D., Penn State College of Medicine, Hershey, Pennsylvania.*
